# Supplementary material for: All-sputtered, flexible, bottom-gate IGZO/Al2O3 bi-layer thin film transistors on PEN fabricated by a fully room temperature process
Source: Royal Society of Chemistry journal article supplement (doi:10.1039/c7tc02068f), 2017-01-01
Supplement: c7tc02068f1.pdf [file c7tc02068f1.pdf]

## Supporting Information

### All-sputtered, flexible, bottom-gate IGZO/Al<sub>2</sub>O<sub>3</sub> bi-layer thin film transistors on PEN fabricated by fully room temperature process

Zeke Zheng,<sup>a</sup> Yong Zeng,<sup>a</sup> Rihui Yao,<sup>\*a</sup> Zhiqiang Fang,<sup>a</sup> Hongke Zhang,<sup>a</sup> Shibei Hu,<sup>a</sup> Xiaoqing Li,<sup>a</sup> Honglong Ning,<sup>\*a</sup> Junbiao Peng,<sup>\*a</sup> Weiguang Xie,<sup>b</sup> and Xubing Lu<sup>c</sup>

**Corresponding Authors:** \*E-mail: [yaorihui@scut.edu.cn](mailto:yaorihui@scut.edu.cn); \*E-mail: [ninghl@scut.edu.cn](mailto:ninghl@scut.edu.cn);

<sup>a</sup>Institute of Polymer Optoelectronic Materials and Devices, State Key Laboratory of Luminescent Materials and Devices, South China University of Technology, Guangzhou 510640, China;

<sup>b</sup>Siyuan Laboratory, Guangzhou Key Laboratory of Vacuum Coating Technologies and New Energy Materials, Department of Physics and Department of Electronic Engineering, Jinan University, Guangzhou 510632, China;

<sup>c</sup>Institute for Advanced Materials and Guangdong Provincial Key Laboratory of Quantum Engineering and Quantum Materials, South China Normal University, Guangzhou 510006, China.

#### BF-STEM image and EDS mapping scan of channel region.

From the BF-STEM and EDS results in Figure S1, an ultrathin Al<sub>2</sub>O<sub>3</sub> layer upon IGZO can be significantly observed and proved by the distribution of Al element. Meanwhile, uniform distribution of In, Ga, Zn elements were also obtained in the IGZO layer without obvious aggregation.

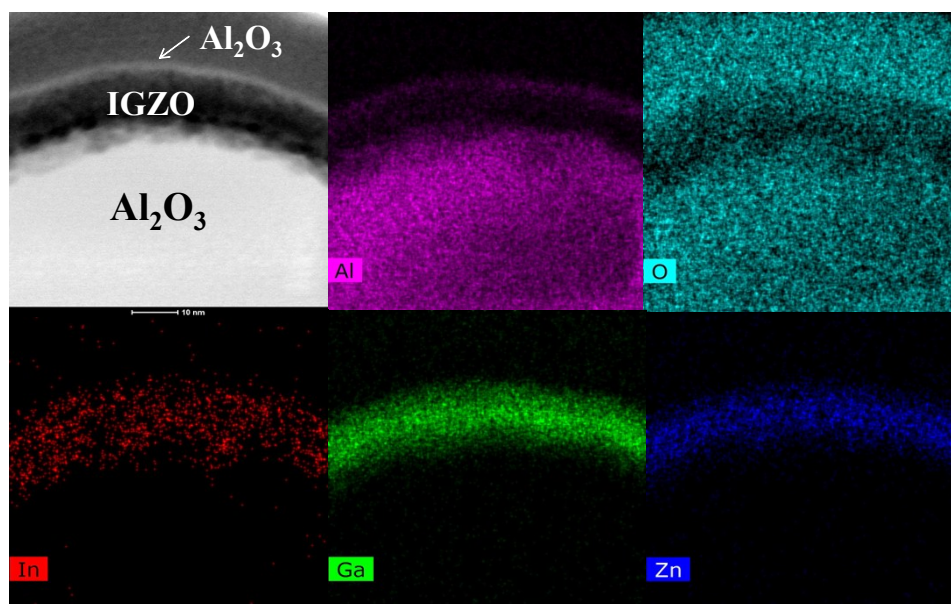

Fig. S1 EDS mapping scan for the channel region of IGZO/Al<sub>2</sub>O<sub>3</sub> bi-layer TFT.

#### Atomic ratio of In, Ga, Zn obtained by XPS measurements.

The atomic ratio of In, Ga, Zn in 50-nm-thick IGZO films on glass sputtered by different modes on the same IGZO target (In: Ga: Zn=1:1:1 at%) was obtained by XPS measurements. As shown in Table S1, the three IGZO films had showed a similar atomic ratio of In, Ga, Zn elements closed to 1:1:1 at%, which indicated that there is no significant composition segregation caused by the different sputtering modes under the same depositing condition.

**Table S1.** Atomic ratio of In, Ga, Zn in 50-nm-thick IGZO on glass sputtered by different modes.

| Element  | In     | Ga     | Zn     |
|----------|--------|--------|--------|
| PDC-IGZO | 35.03% | 36.72% | 28.25% |
| DC-IGZO  | 32.71% | 37.57% | 29.71% |
| RF-IGZO  | 30.58% | 35.69% | 33.73% |

**Atomic force microscope (AFM) images of Al<sub>2</sub>O<sub>3</sub> gate insulator on Al/SiO<sub>2</sub>/PEN and PDC-IGZO, DC-IGZO, RF-IGZO on Al<sub>2</sub>O<sub>3</sub>/Al/SiO<sub>2</sub>/PEN.**

The AFM images of (a) Al<sub>2</sub>O<sub>3</sub> gate insulator on Al/SiO<sub>2</sub>/PEN; (b) PDC-IGZO, (c) DC-IGZO and (d) RF-IGZO on Al<sub>2</sub>O<sub>3</sub>/Al/SiO<sub>2</sub>/PEN are given in Fig. S2a-d. The surface of Al<sub>2</sub>O<sub>3</sub> gate insulator on plastic substrate is a bit rough with a Rq of 4.02nm, which is consistent to the TEM images in Fig.1c. However, the relative density of sputtered Al<sub>2</sub>O<sub>3</sub> can reach 92% measured by X-ray reflectivity (XRR), as shown in Fig. S3, which help avoid the high leakage current. Moreover, the Rq of PDC, DC, RF IGZO layers on Al<sub>2</sub>O<sub>3</sub>/Al/SiO<sub>2</sub>/PEN range from 3.05 to 4.66 nm. The smoothest surface of PDC-IGZO can also contribute to the best performance of PDC-IGZO/Al<sub>2</sub>O<sub>3</sub> TFT among all these devices.

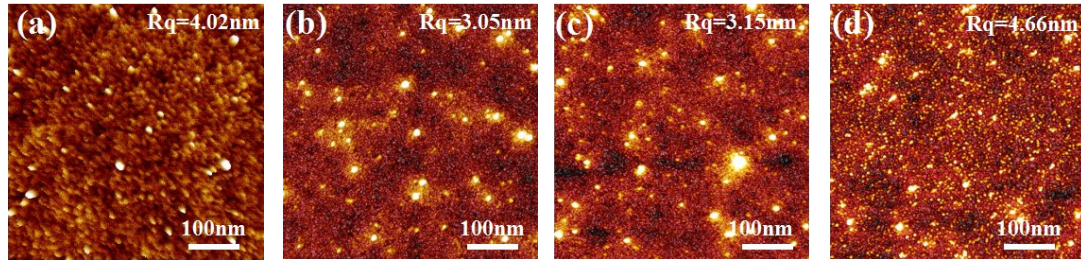

**Fig. S2** The AFM images of (a) Al<sub>2</sub>O<sub>3</sub> gate insulator on Al/SiO<sub>2</sub>/PEN; (b) PDC-IGZO, (c) DC-IGZO and (d) RF-IGZO on Al<sub>2</sub>O<sub>3</sub>/Al/SiO<sub>2</sub>/PEN

**X-ray reflectivity (XRR) measurement of Al<sub>2</sub>O<sub>3</sub> gate insulator.**

According to the result of X-ray reflectivity (XRR) measurement, the density of sputtered Al<sub>2</sub>O<sub>3</sub> was simulated to 3.21 g/cm<sup>3</sup>, the relative density reach up to 92%, which help avoid the high leakage current.

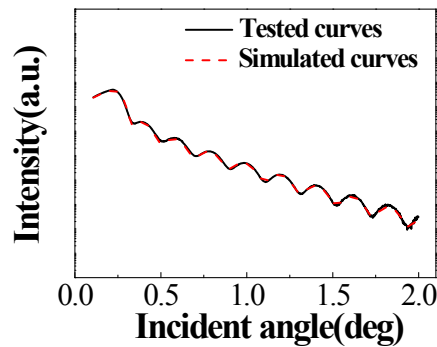

**Fig. S3** The X-ray reflectivity measurement of the 100 nm sputtered Al<sub>2</sub>O<sub>3</sub> insulator on glass.

**The I-V curves with Leakage current of TFTs.**

The leakage current of the four devices is showed in Fig. S4a-d. All kinds of IGZO/Al<sub>2</sub>O<sub>3</sub> TFTs (Fig. S4a-c) exhibited lower leakage current than the single IGZO TFT (Fig.S3d), implying that the IGZO/Al<sub>2</sub>O<sub>3</sub> structure can decrease the leakage current as explained in Fig. 7a.

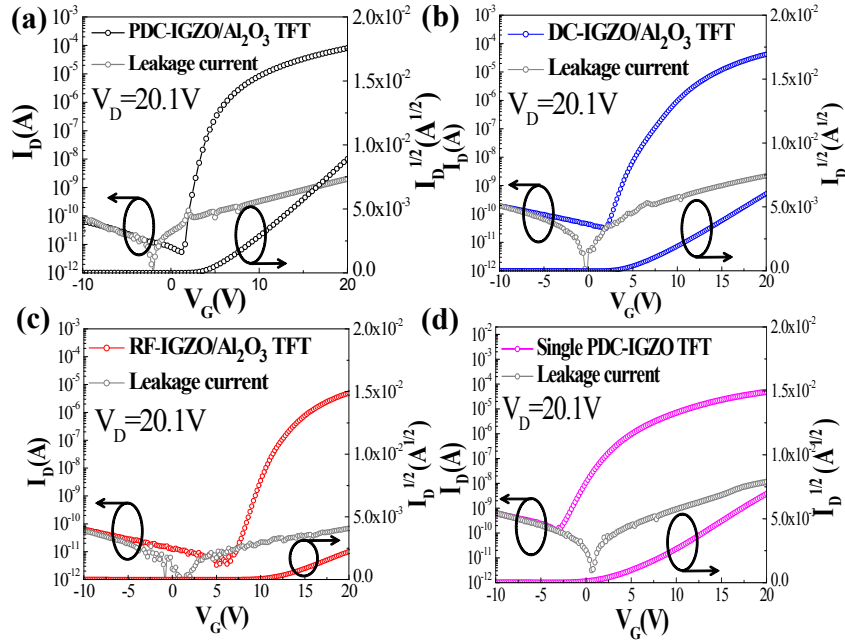

**Fig. S4** The I-V curves with Leakage current of (a) PDC-IGZO/Al<sub>2</sub>O<sub>3</sub> TFT; (b) DC-IGZO/Al<sub>2</sub>O<sub>3</sub> TFT; (c) RF-IGZO/Al<sub>2</sub>O<sub>3</sub> TFT and (d) single PDC-IGZO TFT.

**The mobility distribution of PDC-IGZO/Al<sub>2</sub>O<sub>3</sub> bi-layer TFTs.**

As shown in Fig. S5, the PDC-IGZO/Al<sub>2</sub>O<sub>3</sub> bi-layer TFTs exhibited an average saturation mobility of 18.5 cm<sup>2</sup>/Vs and a maximum mobility of 22.6 cm<sup>2</sup>/Vs. The V<sub>th</sub> and SS distribution also suggested that the PDC-IGZO/Al<sub>2</sub>O<sub>3</sub> bi-layer channel has present a promising and uniform performance for driving the oxide TFTs on plastic substrates.

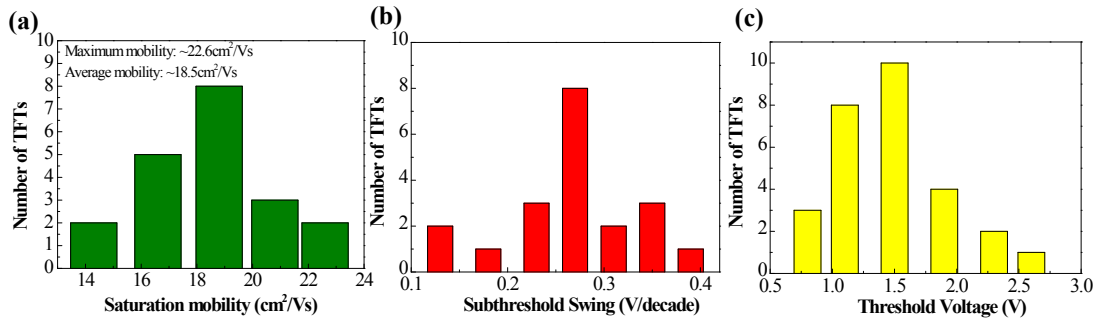

**Fig. S5** The distribution of saturation mobility, subthreshold swing and threshold voltage of twenty PDC-IGZO/Al<sub>2</sub>O<sub>3</sub> bi-layer TFTs in our research.
